# Supplementary material for: Noninvasive and point-of-care screening of snoring by breath monitoring using ion-in-conjugation polymer-based humidity sensors
Source: Royal Society of Chemistry journal article supplement (doi:10.1039/d3sd00042g), 2023-01-01
Supplement: d3sd00042g1.pdf [file d3sd00042g1.pdf]

## Supplementary Information:

### Noninvasive and Point-of-Care Screening of Snoring by Breath Monitoring Using Ion-Conjugation Polymer-based Humidity Sensors

*Ze-Kun Chen,<sup>a</sup> Wei-Wei Bai,<sup>a</sup> Ying-Qian Huo,<sup>\*b</sup> Jing-Hui He<sup>\*a</sup>*

<sup>a</sup> Suzhou Key Laboratory of Novel Semiconductor-Optoelectronics Materials and Devices, College of Chemistry, College of Chemistry, Chemical Engineering and Materials Science, Soochow University, Suzhou 215123, P.R. China.

<sup>b</sup> Department of Neurology, Binzhou Medical University Hospital, Binzhou, Shandong Province, 256603, P. R. China.

E-mail: [yqhuo\\_BMU@126.com](mailto:yqhuo_BMU@126.com); [jinghhe@suda.edu.cn](mailto:jinghhe@suda.edu.cn)

#### Experimental Procedures

**Materials:** 1, 5-diaminoanthraquinone (1, 5-DAAQ), 2, 6-diaminoanthraquinone (2, 6-DAAQ) and croconic acid were purchased from TCI Chemical Co., Ltd. N-butyl alcohol and acetone were purchased from Aladdin Industrial Corporation (Shanghai, China). All chemical reagents are analytical grade and used without further purification.

**Synthesis of Polymers:** Poly (1, 5-diaminoanthraquinone-coronate) (1, 5-PDAC) was prepared through the following method (Fig. 2a): 1, 5-diaminoanthraquinone (1, 5-DAAQ, 238 mg, 1 mmol) and croconic acid (CA, 114 mg, 1 mmol) and n-butyl alcohol (n-BuOH) (25 mL) were added to a flask. The mixture was stirred and refluxed at 130 °C for 24 h. After being filtered and washed with deionized water, the filter cake was washed with acetone in a Soxhlet extractor for 12 h, then with tetrahydrofuran for 24 h. Finally, it was dried under vacuum and dark red powder was obtained. In the same way, poly (2, 6-diaminoanthraquinone-coronate) (2, 6-PDAC) was prepared as black powder (Fig. 2a).

**Fabrication of Humidity Sensor:** Mix 25 mg of polymer in 1 mL of ethanol and disperse the mixture by ultrasonic treatment to obtain a well-dispersed suspension. Subsequently, the solution was brush-coated onto the Al<sub>2</sub>O<sub>3</sub> substrate printed with an Ag-Pd interdigital electrodes (IDES, the channel width and spacing were both 100 μm). Finally, the prepared device was dried under vacuum at 50 °C for 0.5 hours. The Ag-Pd interdigitated electrodes are fabricated by spraying a metal paste onto a ceramic plate by a metal injection system (MJ-10, Beijing Elite Tech Co., Ltd.).

**Wireless snoring monitoring device:** Motivated by large variation range in impedance, high sensitivity and relatively rapid response time of 1, 5-PDAC, we developed a breath monitoring device which can transmit data to mobile phone. 1, 5-PDAC humidity sensor was integrated in a headphone and connected to a logarithmic amplifier (LOG114EVM, Texas Instruments, USA) which convert low-level current signal (1-1000 nA) to a voltage output (0-5 V). The output signal is measured by an Arduino compatible voltage sensor and collected by a programmable Arduino Uno R3 Board. Then, Arduino sends data to personal computer through USB and to mobile phone through Bluetooth. Commercial breath monitors are from the EEG-1200C from NIHON KOHDEN

CORP. Synchronous monitoring process in attachment video and Figure S10.

*Measurements and General Methods:* The optical images were captured by a Canon camera. SEM images and element mapping were characterized using a field emission SEM (FESEM) HITACHI Japan (S-4700). XRD measurements were performed with a multiple crystals X-ray diffractometer (X'Pert PRO, PANalytical) with Cu K $\alpha$  monochromatic radiation source. Fourier transform infrared spectroscopy (FTIR) measurements were conducted by using a VERTEX70. UV-vis absorption spectra were carried out at room temperature (25 °C) with a Shimidazu UV-3600 spectrophotometer. The surface adsorption properties (BET) of four synthetic substances were measured using QUADRASORB evo Gas Sorption Surface Area and Pore Size Analyzer (USA).

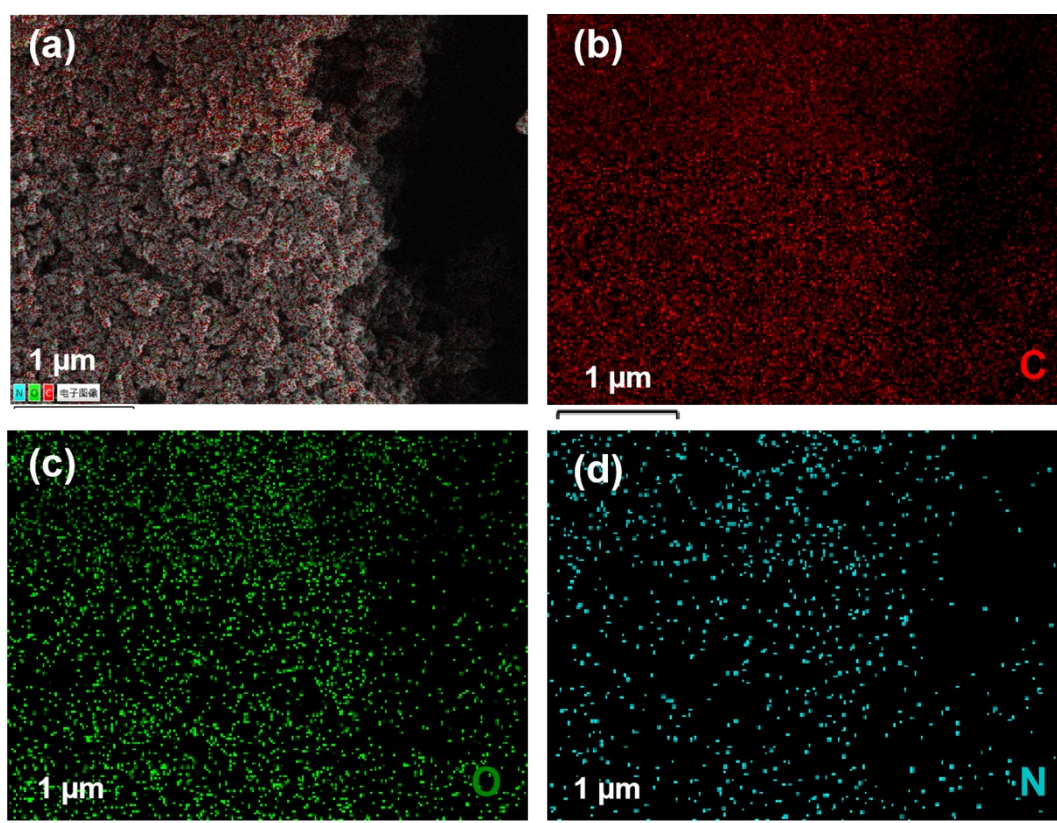

**Fig S1.** (a-d) EDX mapping images of 1, 5-PDAC.

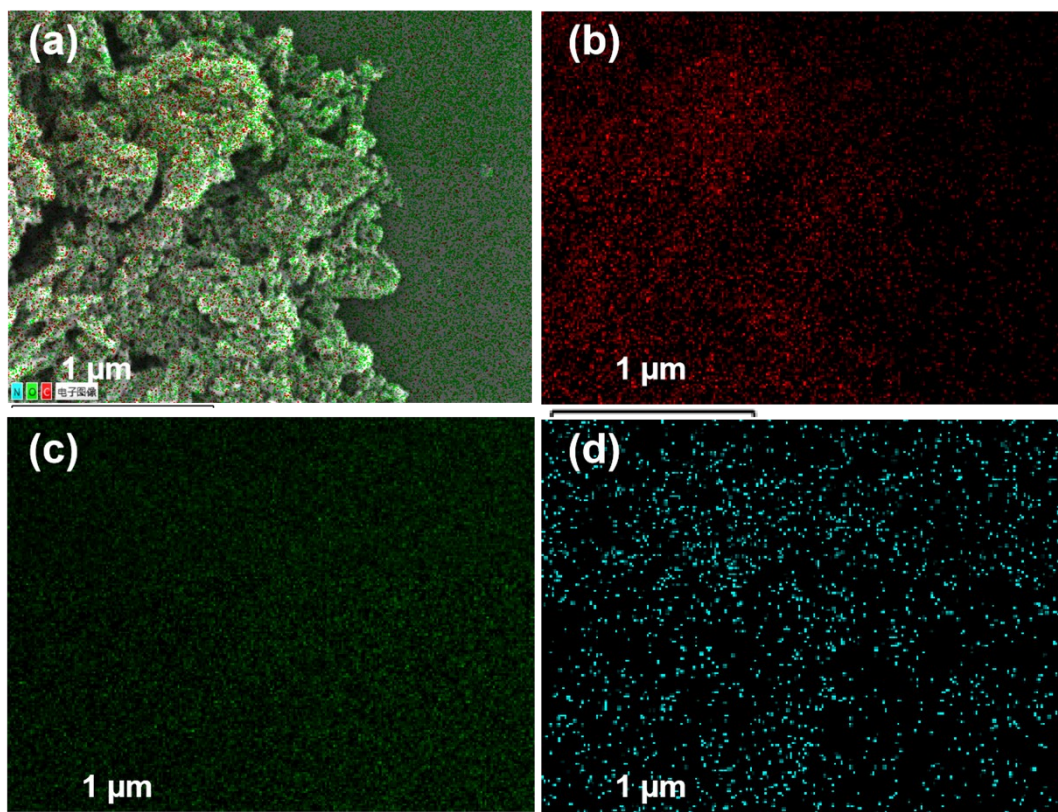

Fig S2. (a-d) EDX mapping images of 2, 6-PDAC.

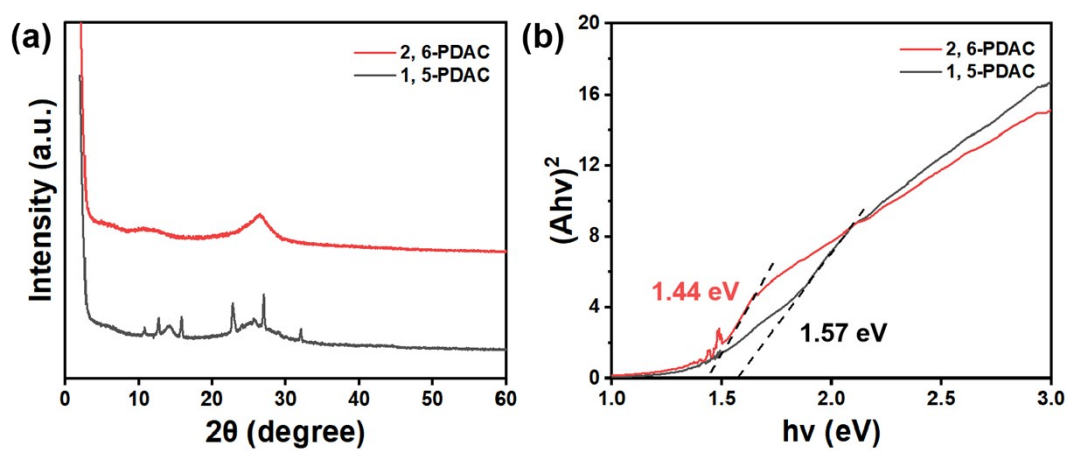

Fig S3. (a) Powder X-ray diffraction of 1, 5-PDAC and 2, 6-PDAC. (b) The Tauc plots of 1, 5-PDAC and 2, 6-PDAC.

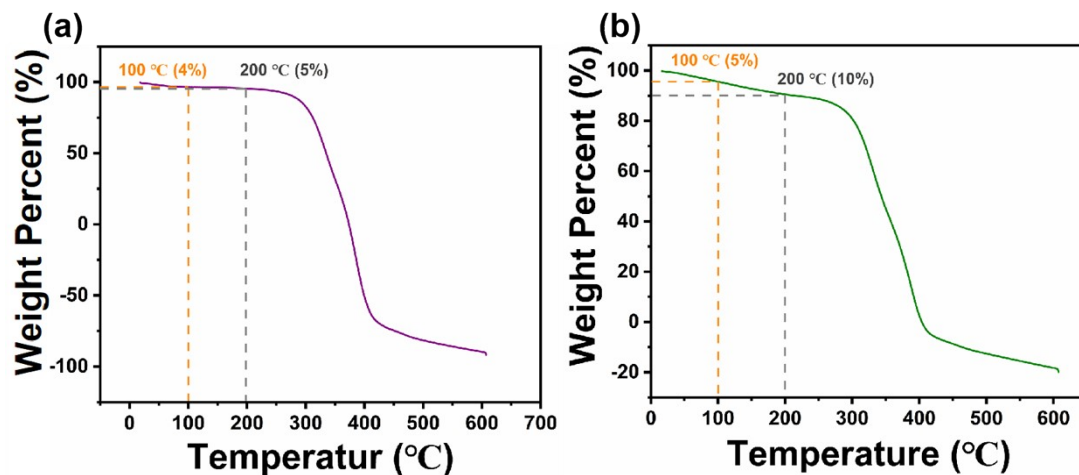

Fig S4. TGA curves of (a) 1, 5-PDAC and (b) 2, 6-PDAC.

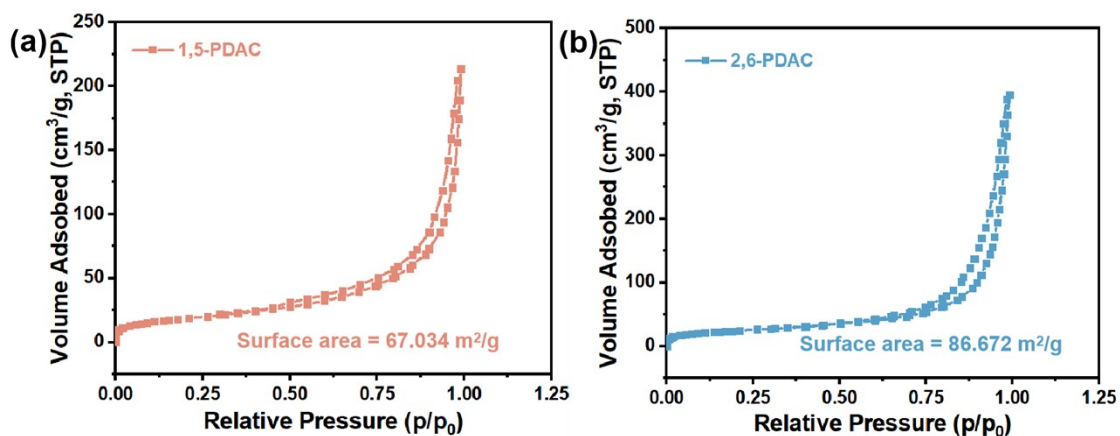

Fig S5. N<sub>2</sub> adsorption isotherm measured at 77.3 K of (a) 1, 5-PDAC (b) 2, 6-PDAC.

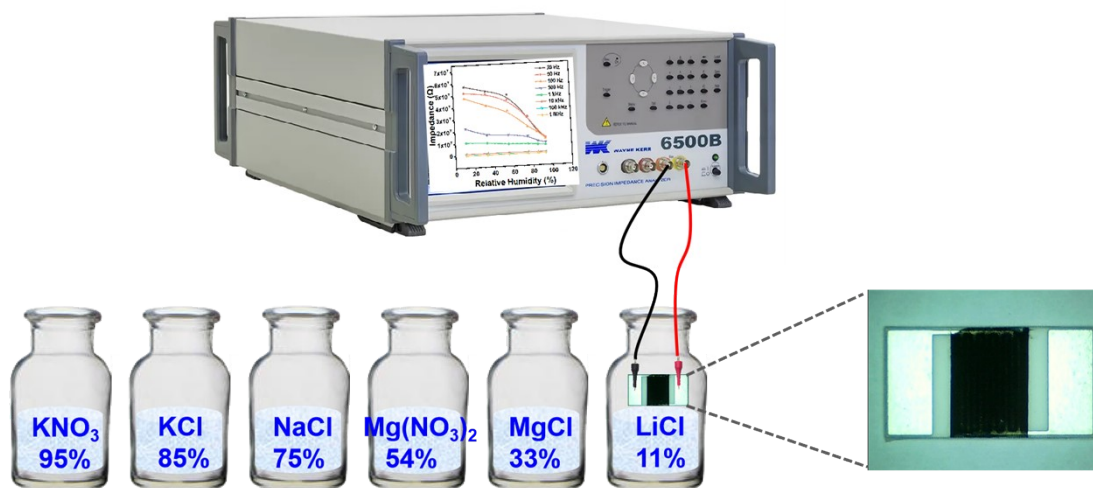

Fig S6. The schematic diagram of the testing equipment and the photos of 1, 5-PDAC and 2, 6-PDAC humidity sensors.

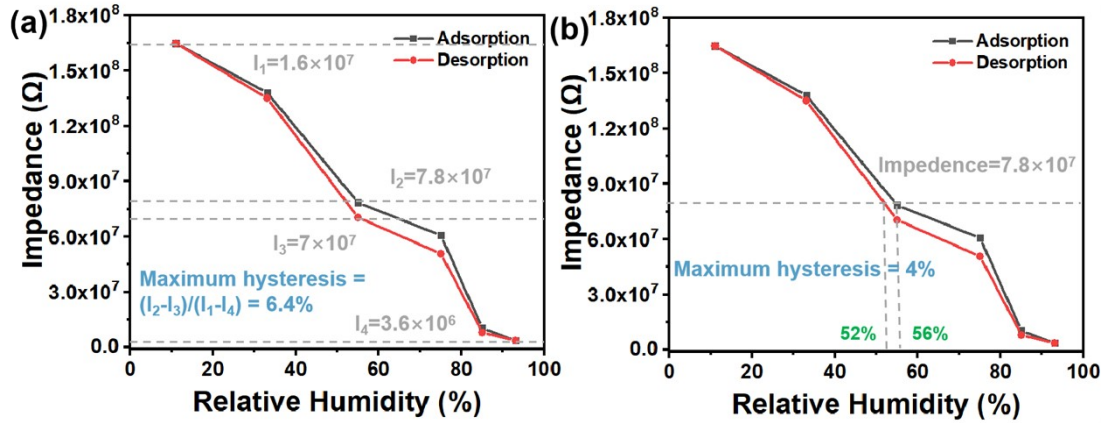

**Fig S7.** Two definitions of the hysteresis: (a) The relative impedance discrepancy when the relative humidity is ascending/descending to the same value. (b) Maximum of  $RH(Z) - RH'(Z)$ , where  $RH(Z)$  and  $RH'(Z)$  refer to the relative humidity at the same impedance when the humidity is scanning ascendingly and descendingly. In this paper, we use method (a).

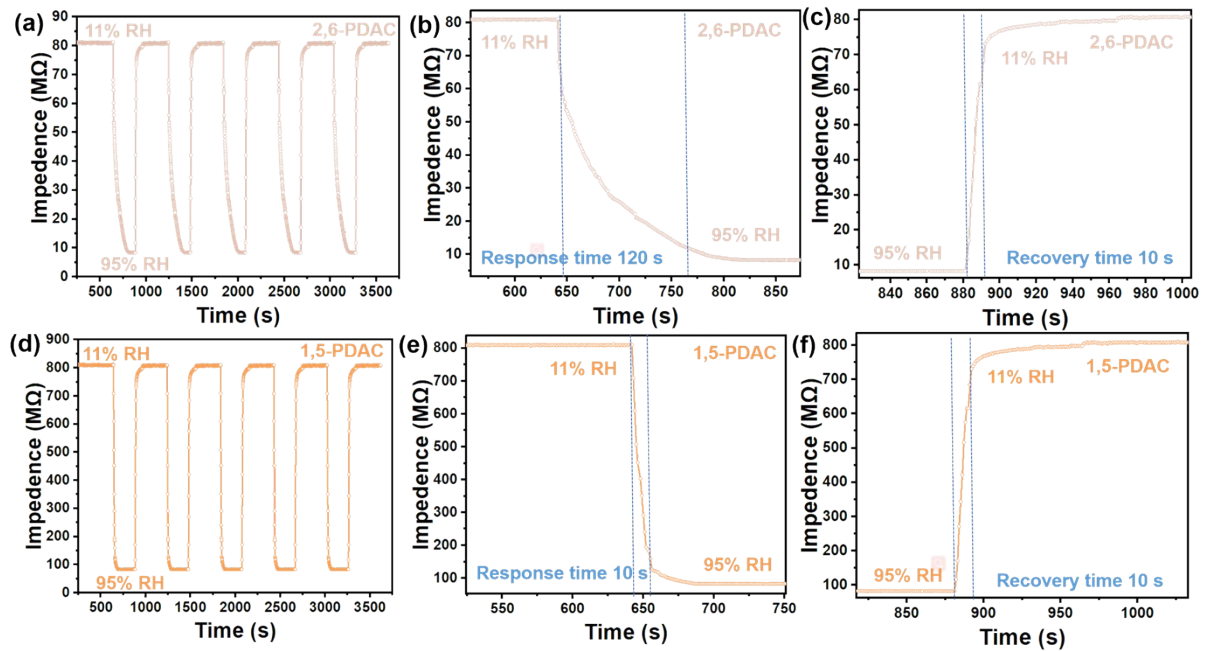

**Fig S8.** The repeatability characteristic of (a) 2, 6-PDAC humidity sensor and (d) 1, 5-PDAC humidity sensor at the humidity varied from 11% to 95% RH; The response and recovery time of (b), (c) 2, 6-PDAC humidity sensor, (e), (f) 1, 5-PDAC humidity sensor.

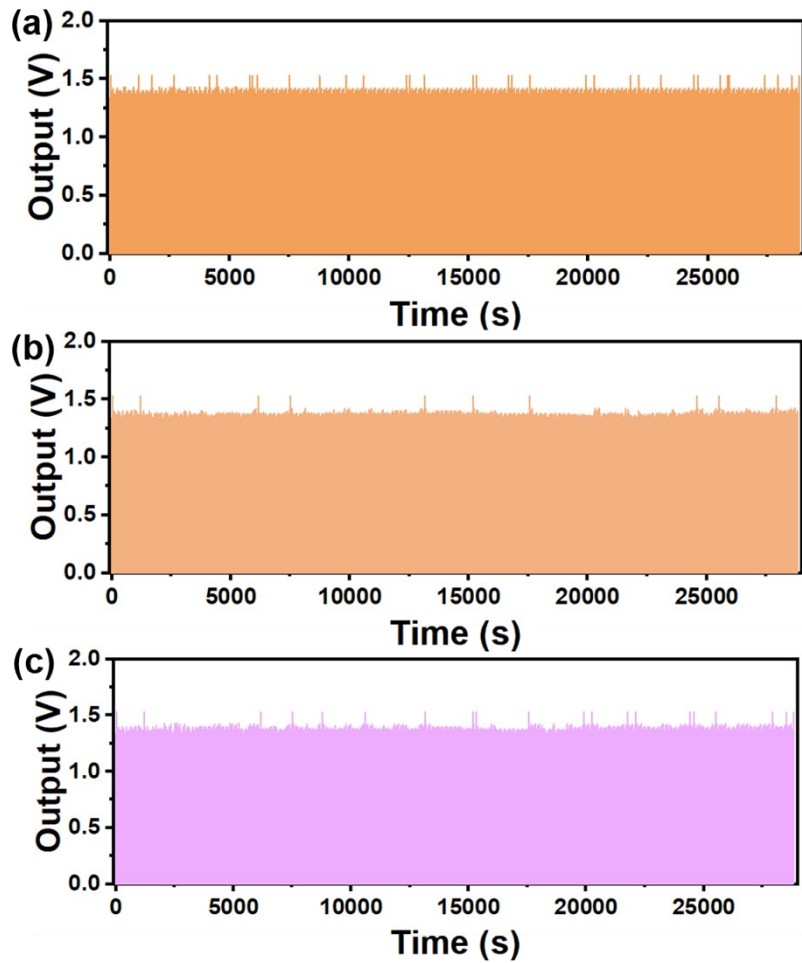

Fig S9. The cycle time stability of 28800 s (8 hours) of the normal breath.

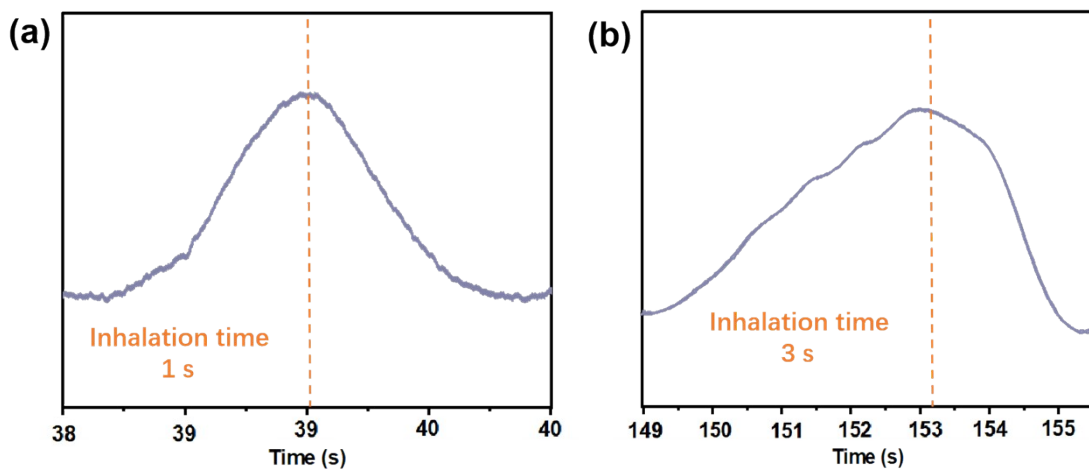

Fig S10. The magnify of breathing time in state of (a) normal breath and (b) snore.

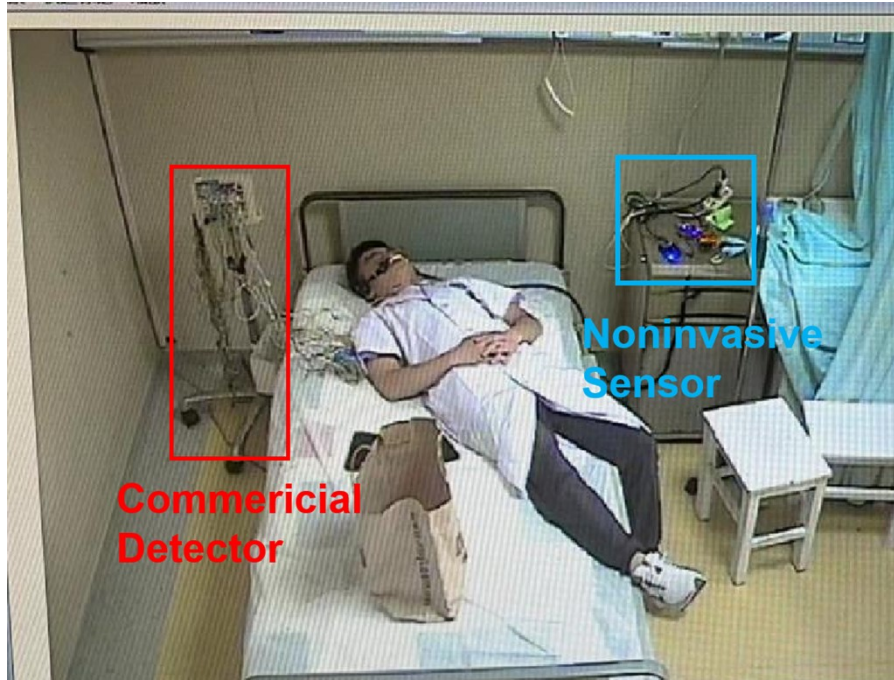

**Fig S11.** Schematic diagram of synchronous breath detection.
